# Supplementary material
Source: publisher figshare collection journal article supplement (https://tandf.figshare.com/articles/dataset/_/12191853)
Supplement: Supplementary file 1 [file 1]

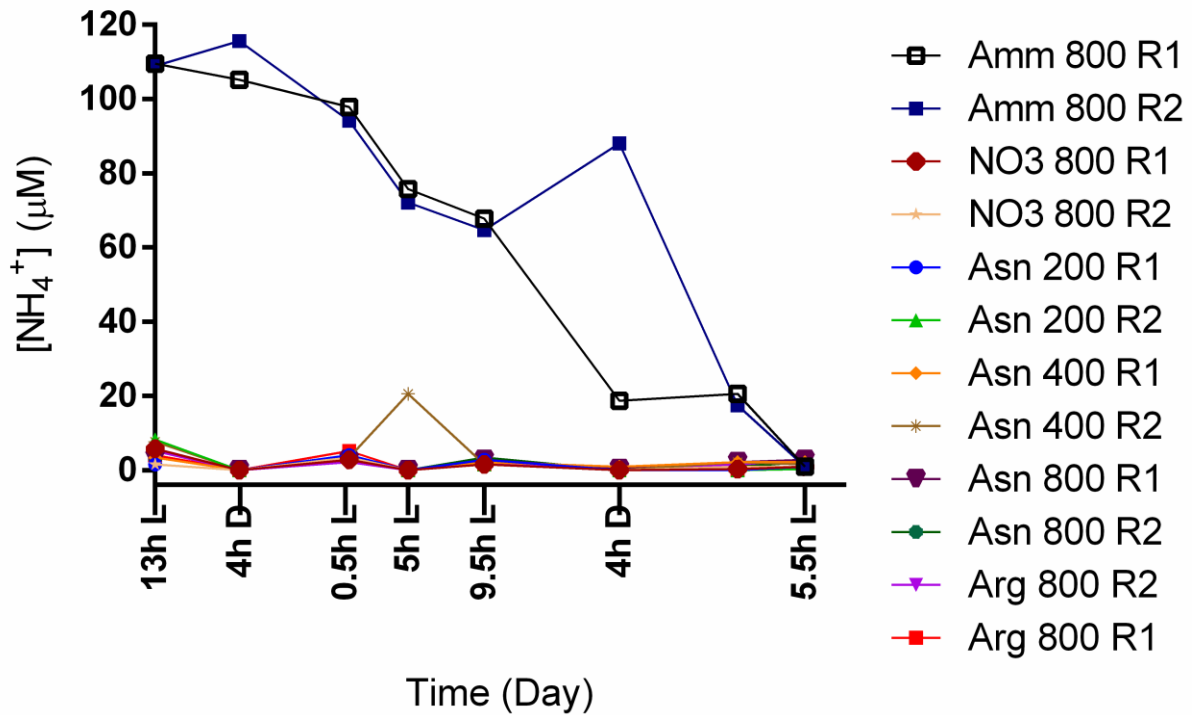

**Supplemental Figure S1.** Quantification of ammonium ( $\text{NH}_4^+$ ) concentrations on the 3<sup>rd</sup> day of cultivation by sampling of the growth medium during the 14h light(L): 10h dark(D) diel cycle. Cells were inoculated on day 0 in media with varying concentrations of asparagine (800  $\mu\text{M}$ , 400  $\mu\text{M}$  and 200  $\mu\text{M}$ ), arginine (800  $\mu\text{M}$ ),  $\text{NH}_4^+$  (800  $\mu\text{M}$ ), or  $\text{NO}_3^-$  (800  $\mu\text{M}$ ).
