# Supplementary material
Source: publisher figshare collection journal article supplement (https://tandf.figshare.com/articles/dataset/_/12191853)
Supplement: Supplementary file 2 [file 1]

Supplemental Table S2. Table showing the results of predicted cellular targets of protein products. Predictions were made using the algal-specific tool, PredAlgo. Provided are computed scores for putative presence in mitochondria (Mit), chloroplasts (Chl), or the extracellular environment (Secretory Pathway, SP).

| Species                              | Protein ID     | Target | Mit  | Chl  | SP   |
|--------------------------------------|----------------|--------|------|------|------|
| <i>Pseudo-nitzschia multistriata</i> | VEU40048.1     | C      | 0.89 | 1.27 | 0.89 |
| <i>Phaeodactylum tricornutum</i>     | Phatr3_EG00333 | SP     | 0.03 | 0.02 | 0.70 |
| <i>Chlamydomonas reinhardtii</i>     | AAB97101.1     | SP     | 0.01 | 0.01 | 1.64 |

Predictions were made using the algal-specific tool, PredAlgo. Provided are computed scores for putative presence in mitochondria (Mit), chloroplasts (Chl), or the extracellular environment (Secretory Pathway, SP).
