# Supplementary material
Source: publisher figshare collection journal article supplement (https://tandf.figshare.com/articles/dataset/_/12191853)
Supplement: Supplementary file 3 [file 1]

|                |     |                                                               |
|----------------|-----|---------------------------------------------------------------|
| P.tricornutum  | 1   | LSNLVDRCRSNTSTRIHFTLPHTHSTMKFSLATLSSLTLLVAPWAVAAASAACPYLEAAAP |
| Chlamydomonas  | 1   | MEKSP-----FFAAL-----AL                                        |
| P.multistriata | 1   | MASATTT---SCSSRNIRSVASFALLFALACLNGSYTAAQ-PSNPSTPPCRFLDDAPP    |
|                |     |                                                               |
| P.tricornutum  | 61  | VEYELPASALTNPLVDLPVKFVGKSVITRSQVPFGSKPRVVVQRYSSKPTIAYDPTDGS   |
| Chlamydomonas  | 13  | V-----MLAGATAVHATAM-----                                      |
| P.multistriata | 57  | LDVEIPS-VLT----HKKLSFLGVAAKVHRKATASGSKPRIRFLRYSSTPTV--DVTRGG  |
|                |     |                                                               |
| P.tricornutum  | 121 | VTISSAACSGGVS---SEE-GSGATSSTKNSLMTMASTLAMYPALGGEIG--AGLALAGA  |
| Chlamydomonas  | 27  | -----                                                         |
| P.multistriata | 110 | ILVSAEGSGCDVSVDVSILSSSAPSRSTPRRLLAASAVAAGFLSSHKLGMLIAVLCLSSP  |
|                |     |                                                               |
| P.tricornutum  | 174 | ALTNLPT--AHAQDESCMPSEVVMVEAPAAAYRGAVETCLA EVTQSQCPLPFPTEPTC-- |
| Chlamydomonas  | 27  | -----EKVGNYLIPVE-----SGE--TEGA                                |
| P.multistriata | 170 | SLVPGSAFAEAASSSTCTPSMEIVLEAPPYYLGSVEECLRSVSNPDHCPEPFPEFPICGA  |
|                |     |                                                               |
| P.tricornutum  | 230 | ---S-TPSPTCGVAVVGAGAGGLYTALRMVDERATEASDVCIFETTERVGGRLFSLRGLG  |
| Chlamydomonas  | 45  | ---ETVMPKKCDVVVGCGCGGIYSAYRLSGTTLKP-SVCTFEATNRVGGRIFSIRGLG    |
| P.multistriata | 230 | DDRE-LAAPACKLAVVGAGTGGLYTAYRLVEEGVFEGSDICIFEATDRVGGRIYSLRGFG  |
|                |     |                                                               |
| P.tricornutum  | 286 | PDNDLSVDAGGYRTWPEFTPTLHALITEYLNIPMDCYDPSEVPCQKF-NIVDENGNGKAGF |
| Chlamydomonas  | 101 | KLADMTVDLGAIRYVDGRHTLVQGLVENLLKLYVLYDPAS---TQERKIVDDKGGDLGF   |
| P.multistriata | 289 | PEGDISVDAGAYRTWPDYPTTHALITEVLGFDVECYDEDD-PCTKF-NIVGETGEKIGF   |
|                |     |                                                               |
| P.tricornutum  | 345 | ATFVEEMRRLTDAGACFYPFHEVRSIAKIEAPSDTATARNADGTAT-ELHFTNG-ATAV   |
| Chlamydomonas  | 158 | VTFVEELTKLSMSLGMKLFNLSPVTKVDRM--PSTSAD---AQYAVSVM-GPNGKIMKV   |
| P.multistriata | 347 | ASFVEELMSRLIEKGACFFPRHNLVSAHN--NDDAET---DGYASNTLTFSNG-VKTR    |
|                |     |                                                               |
| P.tricornutum  | 403 | ATFTTILGVPQRPLLNILRNSNFANSIM-----TAAKWD-AVHSV                 |
| Chlamydomonas  | 211 | VAKHVI FNTQQRPLMRILQNSNLARVT-----EWSSALDMP                    |
| P.multistriata | 400 | ATHGTILNVPQRALLEILRESKDLFSSSSSSPSSIASGTNLDRSAREEEKRTYD-SLHSV  |
|                |     |                                                               |
| P.tricornutum  | 442 | QTVIASKLYLYYPRGQVFWRKLNLAGDGFELDGD-----ARNMLLAGRYHDGHV        |
| Chlamydomonas  | 247 | FPLMAAKMYLYYDD--AWWVYMNRTTGSLNDPNTNNATTFNSSSLFTTPPLRGYHDGDW   |
| P.multistriata | 459 | QTEIVTKLYLYYED--AWWYKLGTLTGDFSLPGD-----ARSMLLEGYHDGHV         |
|                |     |                                                               |
| P.tricornutum  | 491 | ECEDENDP-DTCRGFLLAVYANDLSGNKAQFF-----RRYQDRPEP                |
| Chlamydomonas  | 305 | KCNADN---TKCHGMFMYTYASDNGGTYNRGGQGLDISPYNGVVPRIYWNVAVNPDPSKP  |
| P.multistriata | 506 | KCEATDDGDEKCYGFLAVYAHDFSGTKAQYF-----RRFQDRPEP                 |
|                |     |                                                               |
| P.tricornutum  | 532 | VTILSNSDLESAEFLKHAHAQLEQYHLYENPGANYTGSEALAAFR-----NVNPPPEFAV  |
| Chlamydomonas  | 362 | YVVLDMTSSGGKNLIMEAHKKVVDYHISINAS-----IPEPY-----ASTYPSQAV      |
| P.multistriata | 548 | VTILSDTNPEEEDFLRHAHERLVVDYHVYGEDNARLLNASAYSPPQFRKIIESPPPTFAV  |
|                |     |                                                               |
| P.tricornutum  | 586 | LSTWNEAVPWAGGAHW-----TDIDNID--LAQKPLADSNIFVVNEAFSL            |
| Chlamydomonas  | 408 | VVWWDPOIQWTGGAWHSYKNGIYGSQVSTNYTDPRNAVPVASIKPFAGENVVVANEAFSA  |
| P.multistriata | 608 | LANWNTAAFGAGGWHHW-----TDTANAE--KAMKPLNPLGIHVNEAFSK            |
|                |     |                                                               |
| P.tricornutum  | 631 | LHGWAEGSIKLADSILEDYFNIA RPWNFEVSDFVQFVQQTNSRECVEGEGGSSGGGTDGG |
| Chlamydomonas  | 468 | VQGWAEGLLMAENVVTQ-LGAARPTFIS-----TQRHDCVLYPSY--NY----         |
| P.multistriata | 653 | IQGWAEGLLLADEILEEHYGVARPWSFEVPQSIFYLAQTSSEECVAGDDA--GSGQSGG   |

|                |     |                                                                 |
|----------------|-----|-----------------------------------------------------------------|
| P.tricornutum  | 691 | SSGGGGGDTSSGGGG-GASNPALCFTEDALVTMADGSLKRIVDVQLGDRVVTGTGKGNGLV   |
| Chlamydomonas  | 510 | -----NATL-----CGLS                                              |
| P.multistriata | 711 | S-----SSGGAGPVAGELDLCAAGSLVEMANGNLVPIEDVVEEGDSVATGVGGKIGLV      |
|                |     |                                                                 |
| P.tricornutum  | 750 | TEKLIHPVKKT-----VPVAILATKDGDLTGTPHPIY--HQGEWIEMG                |
| Chlamydomonas  | 518 | LNPLVQGVTRR-----RAAAVSAS-----                                   |
| P.multistriata | 765 | TEKLVHPVRMKEAKKTAWGAPYRTRRWSDVVVVPTTEHGDLVGTDPDHPVLLGNSSSEWMELG |
|                |     |                                                                 |
| P.tricornutum  | 792 | D-LTSDLLTLT----EAHVEAFYNLEIDGD-----QAGTSSHSYVVNGIVASGLGDN       |
| Chlamydomonas  | 537 | -----ASIASETL-KAAAAGLSGG                                        |
| P.multistriata | 825 | DALERNLLAVGARRVSRDVIDIFYNLEIDGKVKYKDDGRQAQQSPHSYVVNGVVASGLGDN   |
|                |     |                                                                 |
| P.tricornutum  | 839 | EDLNKLSPRQKIWKDEV-----IDVISQ-----                               |
| Chlamydomonas  | 555 | RKLGAY-----                                                     |
| P.multistriata | 885 | PLLNRLFPRQRVFLEEQSKHHHDIDLISATSIVDKT                            |

**Supplemental Figure S2.** Sequence alignment of the *Chlamydomonas reinhardtii* LAO1 protein (AAB97101.1) and putative orthologs identified in the diatoms *Phaeodactylum tricornutum* (Phatr3\_EG00033) and *Pseudo-nitzschia multistriata* (VEU40048.1).
