# Supplementary material
Source: publisher figshare collection journal article supplement (https://tandf.figshare.com/articles/dataset/_/12191853)
Supplement: Supplementary file 4 [file 1]

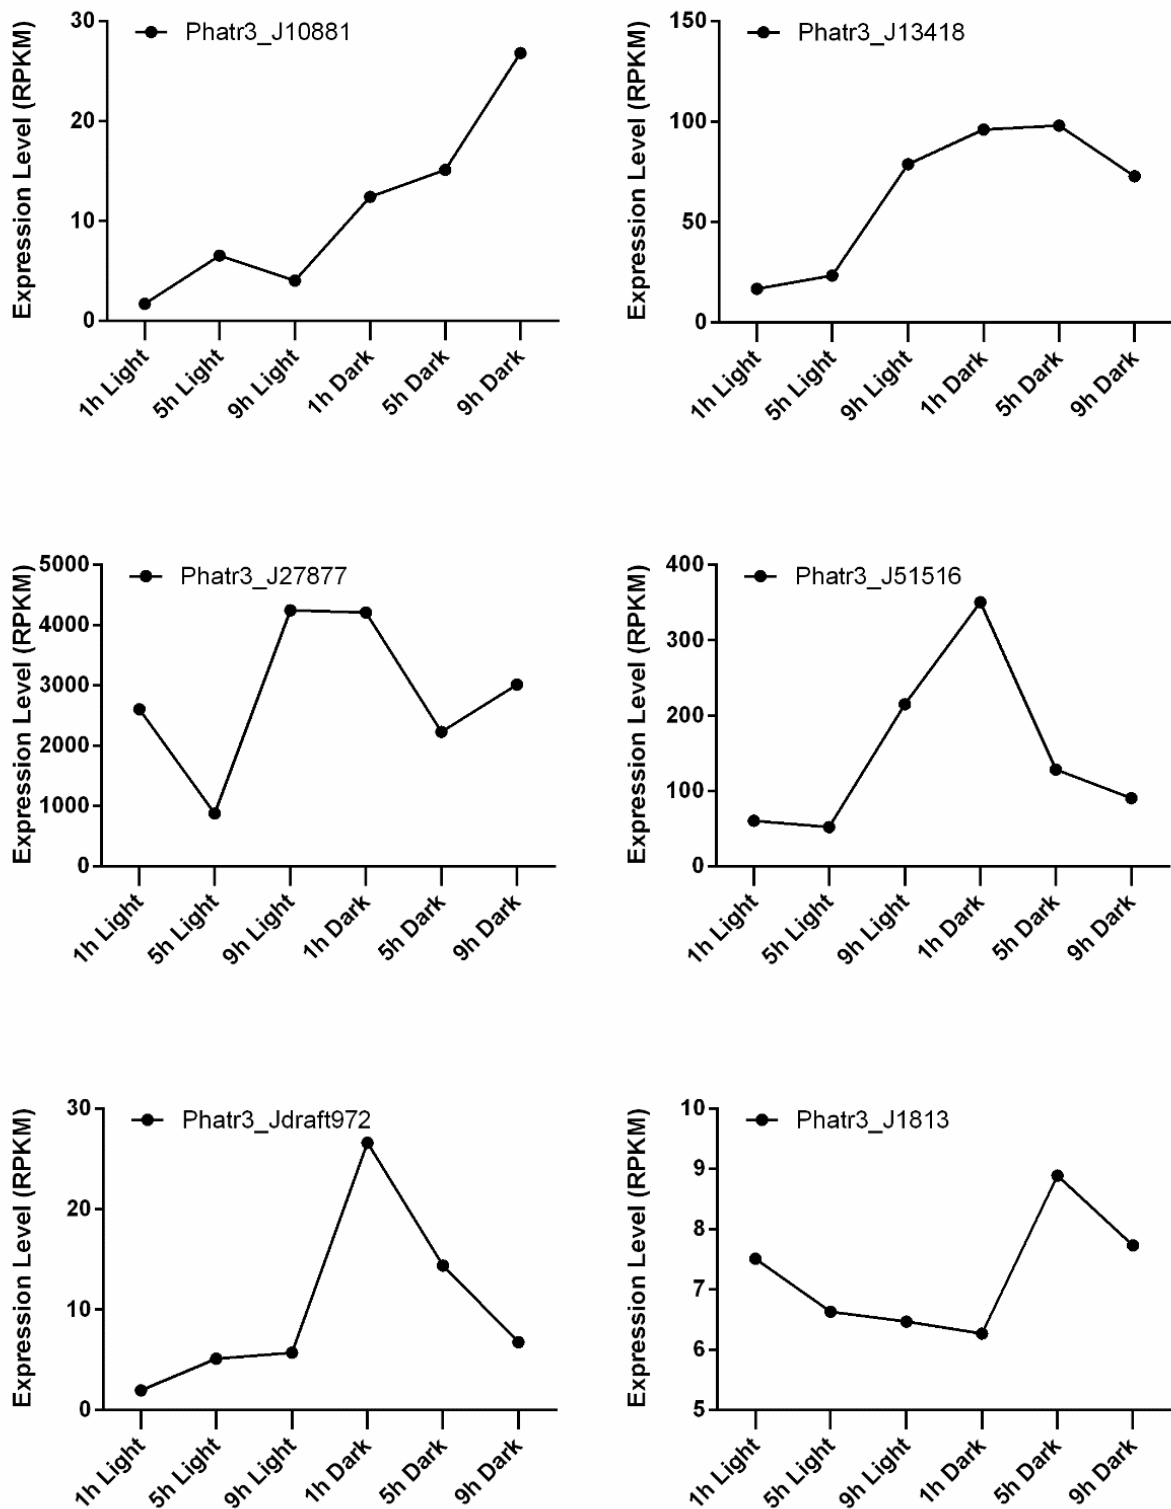

**Supplemental Figure S4.** Diel gene expression profiles of ammonium permeases using average RPKM data from 3 biological replicates in nutrient replete conditions, as reported by Smith et al. (2016). The legends corresponds to the protein ID from the *Phaeodactylum tricornutum* genome annotation ASM15095v2 ([http://protists.ensembl.org/Phaeodactylum\\_tricornutum](http://protists.ensembl.org/Phaeodactylum_tricornutum)).
