# Supplementary material
Source: publisher figshare collection journal article supplement (https://tandf.figshare.com/articles/dataset/_/12191853)
Supplement: Supplementary file 5 [file 1]

Supplemental Table S3. List of Protein IDs and associated database for sequences used in phylogentic tree construction

| <b>Organism</b>                      | <b>ID</b>      | <b>Database</b> |
|--------------------------------------|----------------|-----------------|
| <i>Chlamydomonas reinhardtii</i>     | AAB97101.1     | NCBI            |
| <i>Chlamydomonas reinhardtii</i>     | PNW83356       | NCBI            |
| <i>Vitrella brassicaformis</i>       | CEL94447.1     | NCBI            |
| <i>Emiliana huxleyi</i>              | XP_005785782.1 | NCBI            |
| <i>Emiliana huxleyi</i>              | XP_005777092.1 | NCBI            |
| <i>Aureococcus anophagefferens</i>   | XP_009033458.1 | NCBI            |
| <i>Porphyra umbilicalis</i>          | OSX78923.1     | NCBI            |
| <i>Porphyra umbilicalis</i>          | OSX73518.1     | NCBI            |
| <i>Porphyra umbilicalis</i>          | OSX80811.1     | NCBI            |
| <i>Porphyra umbilicalis</i>          | OSX78913.1     | NCBI            |
| <i>Pavlova sp.</i>                   | jgiPavlov2436  | JGI             |
| <i>Pelagophyceae sp.</i>             | jgiPelago2097  | JGI             |
| <i>Gracilaropsis lemaneiformis</i>   | ATE86702.1     | NCBI            |
| <i>Symbiodinium microadriaticum</i>  | OLQ08796.1*    | NCBI            |
| <i>Chondrus crispus</i>              | XP_005713538.1 | NCBI            |
| <i>Chrysochromulina sp. CCMP291</i>  | KOO35684.1     | NCBI            |
| <i>Phaeodactylum tricornutum</i>     | Phatr3_EG00333 | EnsemblProtist  |
| <i>Pseudo-nitzschia multistriata</i> | VEU40048.1     | NCBI            |
