# Supplementary material
Source: publisher figshare collection journal article supplement (https://tandf.figshare.com/articles/dataset/_/12191853)
Supplement: Supplementary file 6 [file 1]

Supplemental Table S1: Matrix showing the percent identity between the three protein alignments in Figure S1.

|                                         | <i>C. reinhardtii</i><br>AAB97101 | <i>P. tricornutum</i><br>Phatr3_EG00333 | <i>P. multistriata</i><br>VEU40048.1 |
|-----------------------------------------|-----------------------------------|-----------------------------------------|--------------------------------------|
| <i>C. reinhardtii</i><br>AAB97101.1     | 100.0                             |                                         |                                      |
| <i>P. tricornutum</i><br>Phatr3_EG00333 | 31.84                             | 100                                     |                                      |
| <i>P. multistriata</i><br>VEU40048.1    | 34.63                             | 49.88                                   | 100                                  |

Alignments were made with the MUSCLE algorithm. Numbers represent the percent identical residues between the alignments.
