# Supplementary material
Source: publisher figshare collection journal article supplement (https://tandf.figshare.com/articles/dataset/_/12191853)
Supplement: Supplementary file 7 [file 1]

Archive with 7 entries (7 files):
- tabg_a_1754289_sm7176.pdf
- tabg_a_1754289_sm7175.pdf
- tabg_a_1754289_sm7174.pdf
- tabg_a_1754289_sm7173.pdf
- tabg_a_1754289_sm7172.pdf
- tabg_a_1754289_sm7171.pdf
- tabg_a_1754289_sm7170.pdf
