# Supplementary material
Source: publisher figshare collection journal article supplement (https://tandf.figshare.com/articles/dataset/_/12191853)
Supplement: Supplementary file 7 [file 1 › tabg_a_1754289_sm7172.pdf]

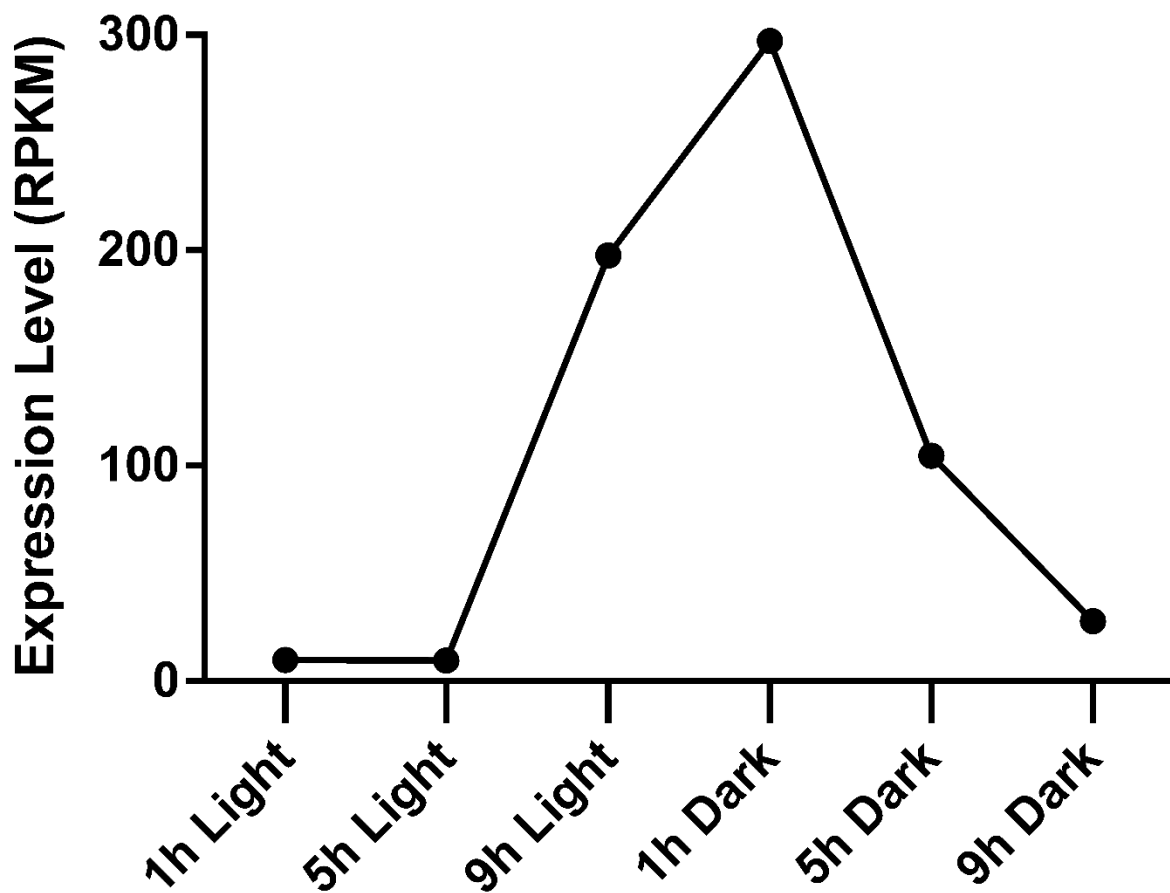

**Supplemental Figure S3:** Diel gene expression profiles of the putative *Phaeodactylum tricornutum* LAAO ortholog (Phatr3\_EG00033) using average RPKM data from 3 biological replicates in nutrient replete conditions, as reported by Smith et al. (2016).
